# Supplementary material
Source: Springer Nature journal article supplement (https://www.springermedizin.de/resource/supplementary/12885_2006_653_MOESM1_ESM.pdf/9470610)
Supplement: MOESM1 [file 9470610]

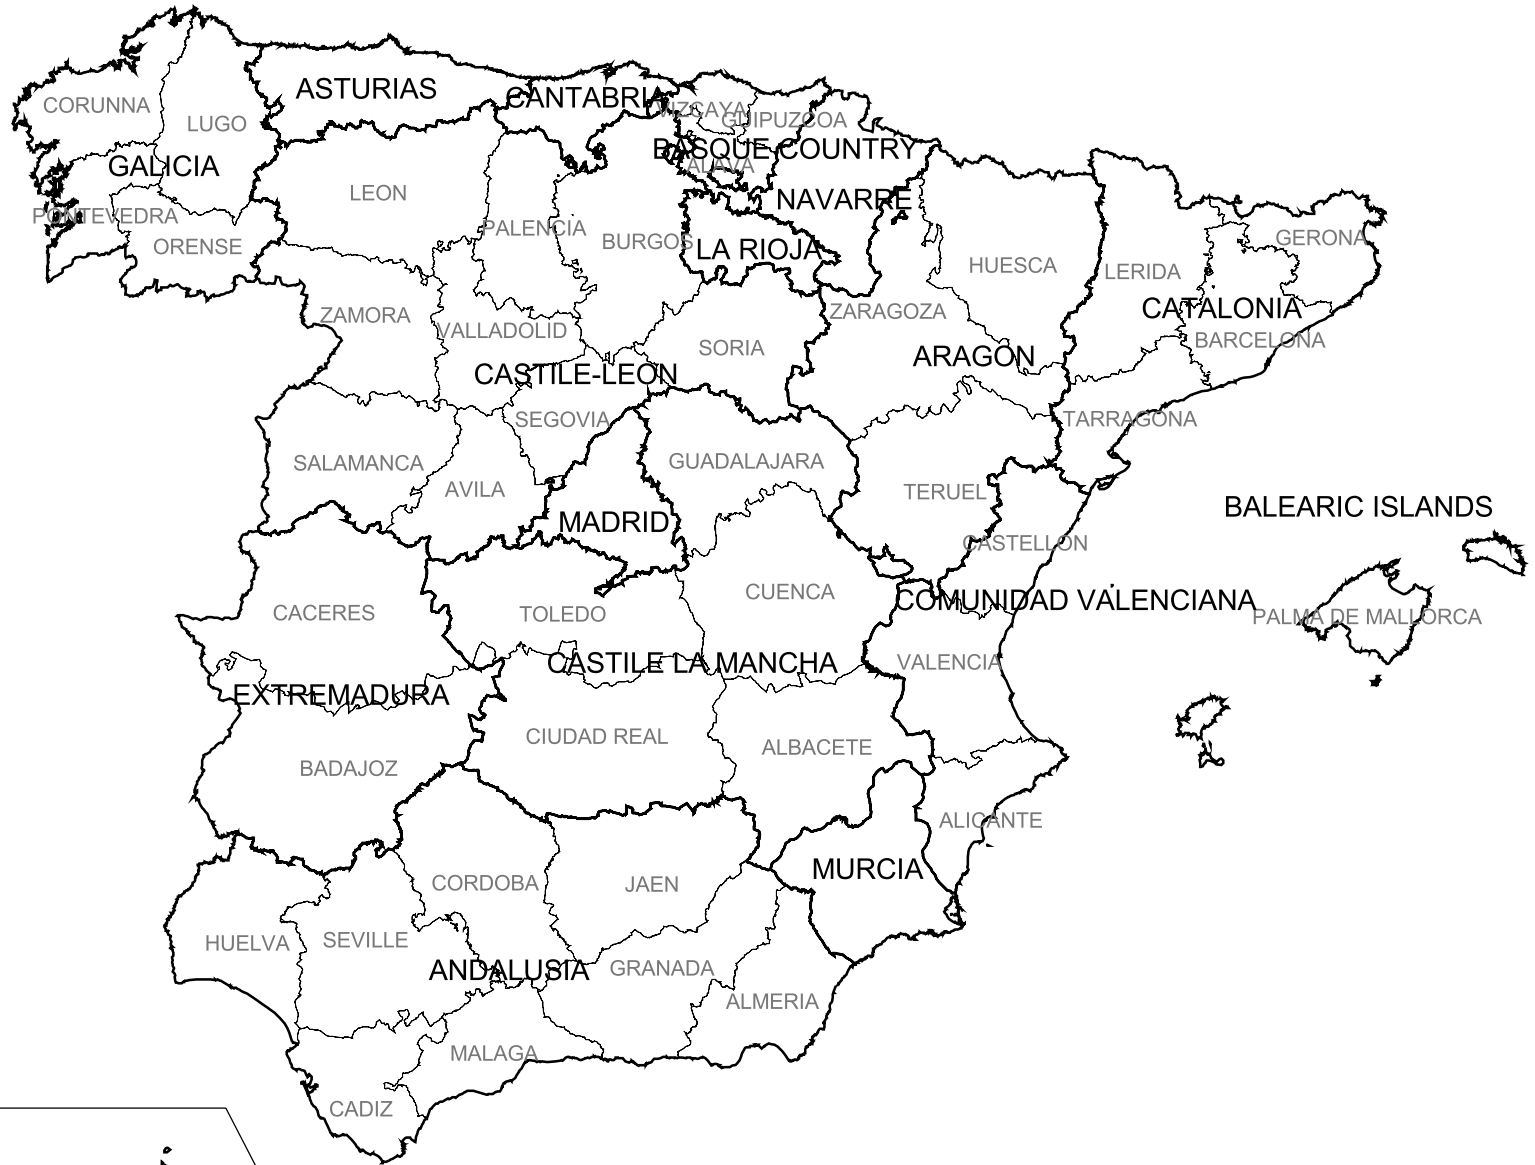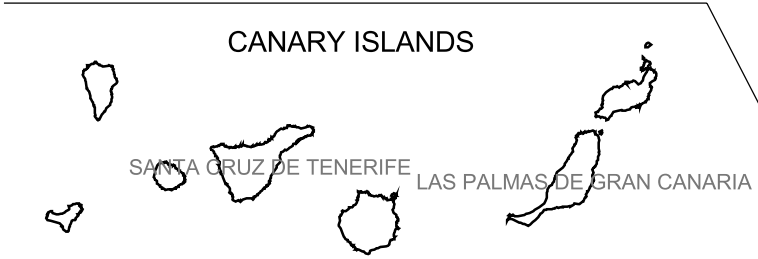

CEUTA  
CEUTA Y MELILLA  
MELILLA
